# Supplementary material for: Support for a clade of Placozoa and Cnidaria in genes with minimal compositional bias
Source: eLife journal article supplement (doi:10.7554/elife.36278), 2018-10-29
Supplement: supp [file elife-36278-supp-v1.zip]

**Bilateria**

Lingula anatina 88  
Crassostrea gigas  
Capitella teleta 64  
Limnognathia maerski 67  
Schistosoma mansoni  
Ramazzottius varieornatus 72  
Pristionchus p 72  
Drosophila melanogaster 66  
Priapulus caudatus  
Nemertoderma westbladi  
Isodiametra pulchra  
Xenoturbella bocki 82  
Strongylocentrotus purpuratus 67  
Mus musculus

**Cnidaria**

Liriope tetraphylla  
Craspedacusta sowerbyi  
Abylopsis tetragona  
Hydra vulgaris 94  
Calvadosia campanulata  
Pelagia noctiluca  
Stomolophus meleagris  
Alatina alata  
Exaiptasia pallida  
Nematostella vectensis  
Acropora digitata  
Alcyonium palmatum  
Gorgonia ventalina

**Placozoa**

Placozoa H4  
Placozoa H6  
Placozoa H11  
Placozoa H1

**Porifera**

Crella elegans  
Cliona varians  
Spongilla lacustris  
Petrosia ficiformis  
Amphimedon queenslandica  
Chondrilla caribensis  
Ircinia fasciculata  
Sympagella nux  
Euplectella aspergillum  
Sycon coactum  
Sycon cilliatum  
Leucosolenia complicata  
Clathrina coriacea  
Oscarella pearsei  
Corticum candelabrum

**Ctenophora**

Mnemiopsis leidyi  
Beroe abyssicola  
Pleurobrachia bachei  
Coeloplana cf. meteoris  
Vallicula multiformis  
Euplokamis dunlapae

Salpingoeca rosetta  
Monosiga brevicollis 88  
Salpingoeca macrocollata 76  
Didymoeca costata  
Acanthoeca spectabilis 36  
Salpingoeca dolichothecata  
Codosiga hollandica
