# Supplementary figures and images for: Support for a clade of Placozoa and Cnidaria in genes with minimal compositional bias
Source: eLife journal article supplement (doi:10.7554/elife.36278), 2018-10-29

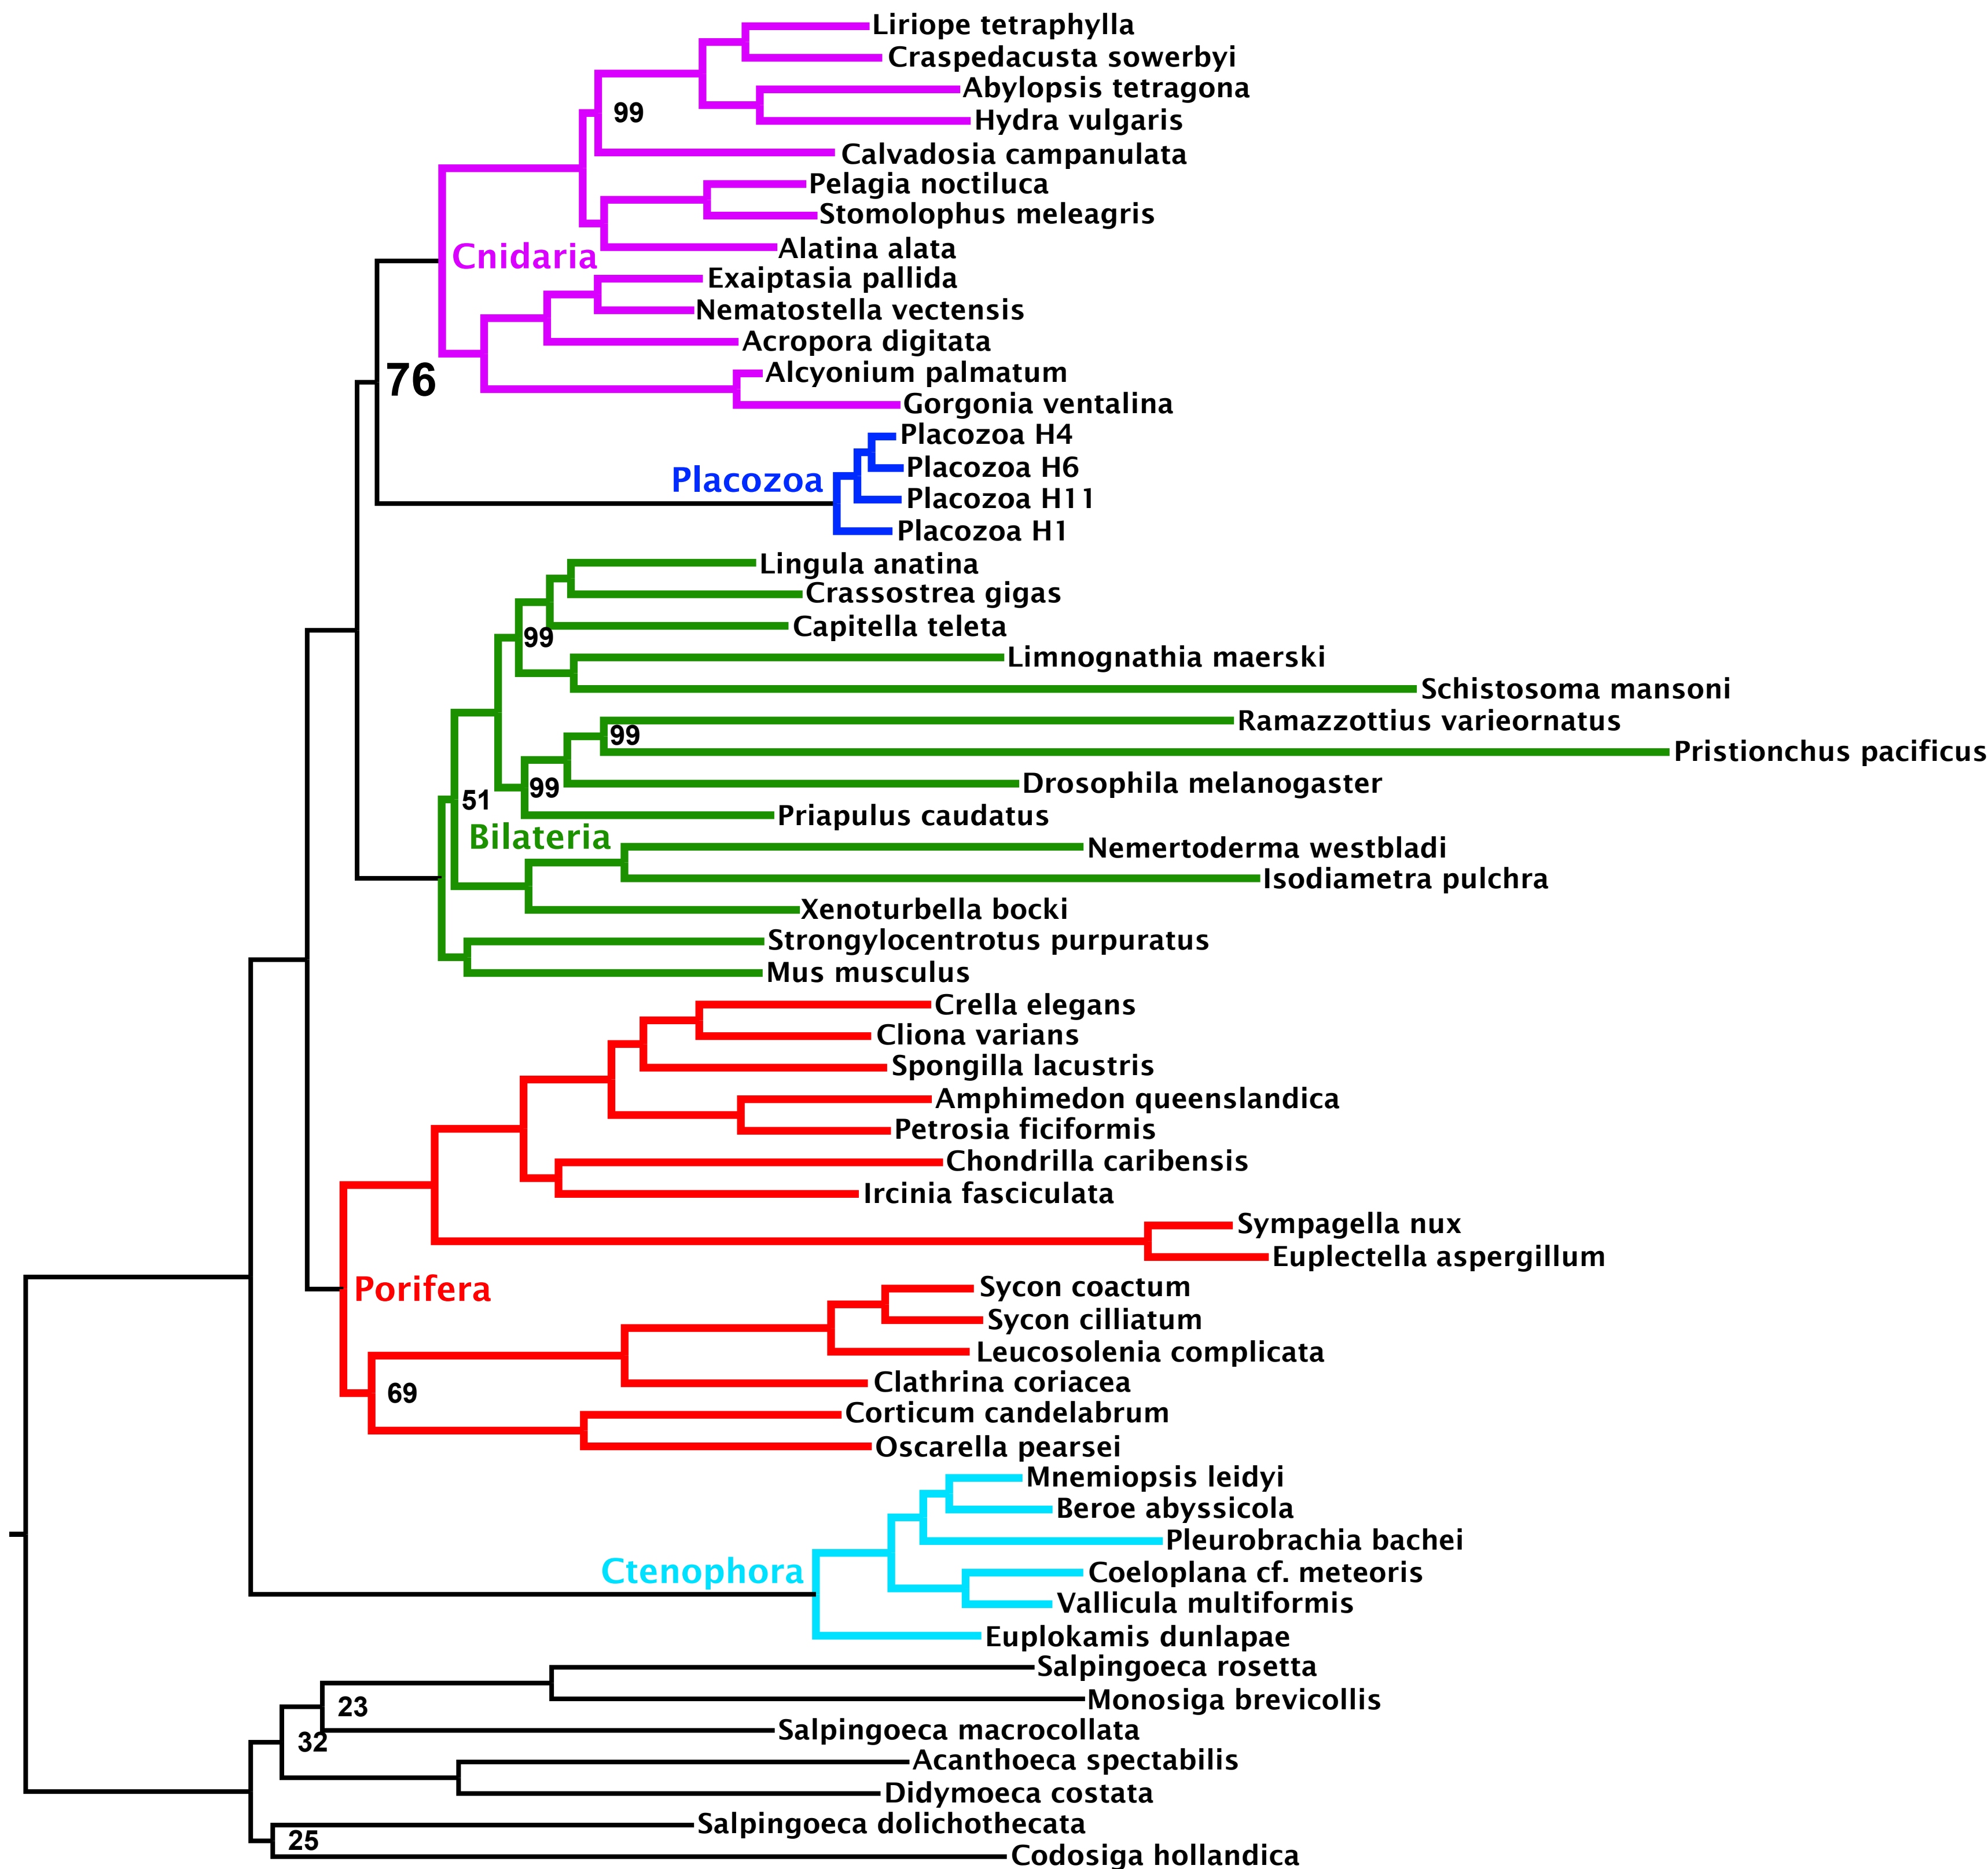

Supplement: supp [file elife-36278-supp-v1.zip]

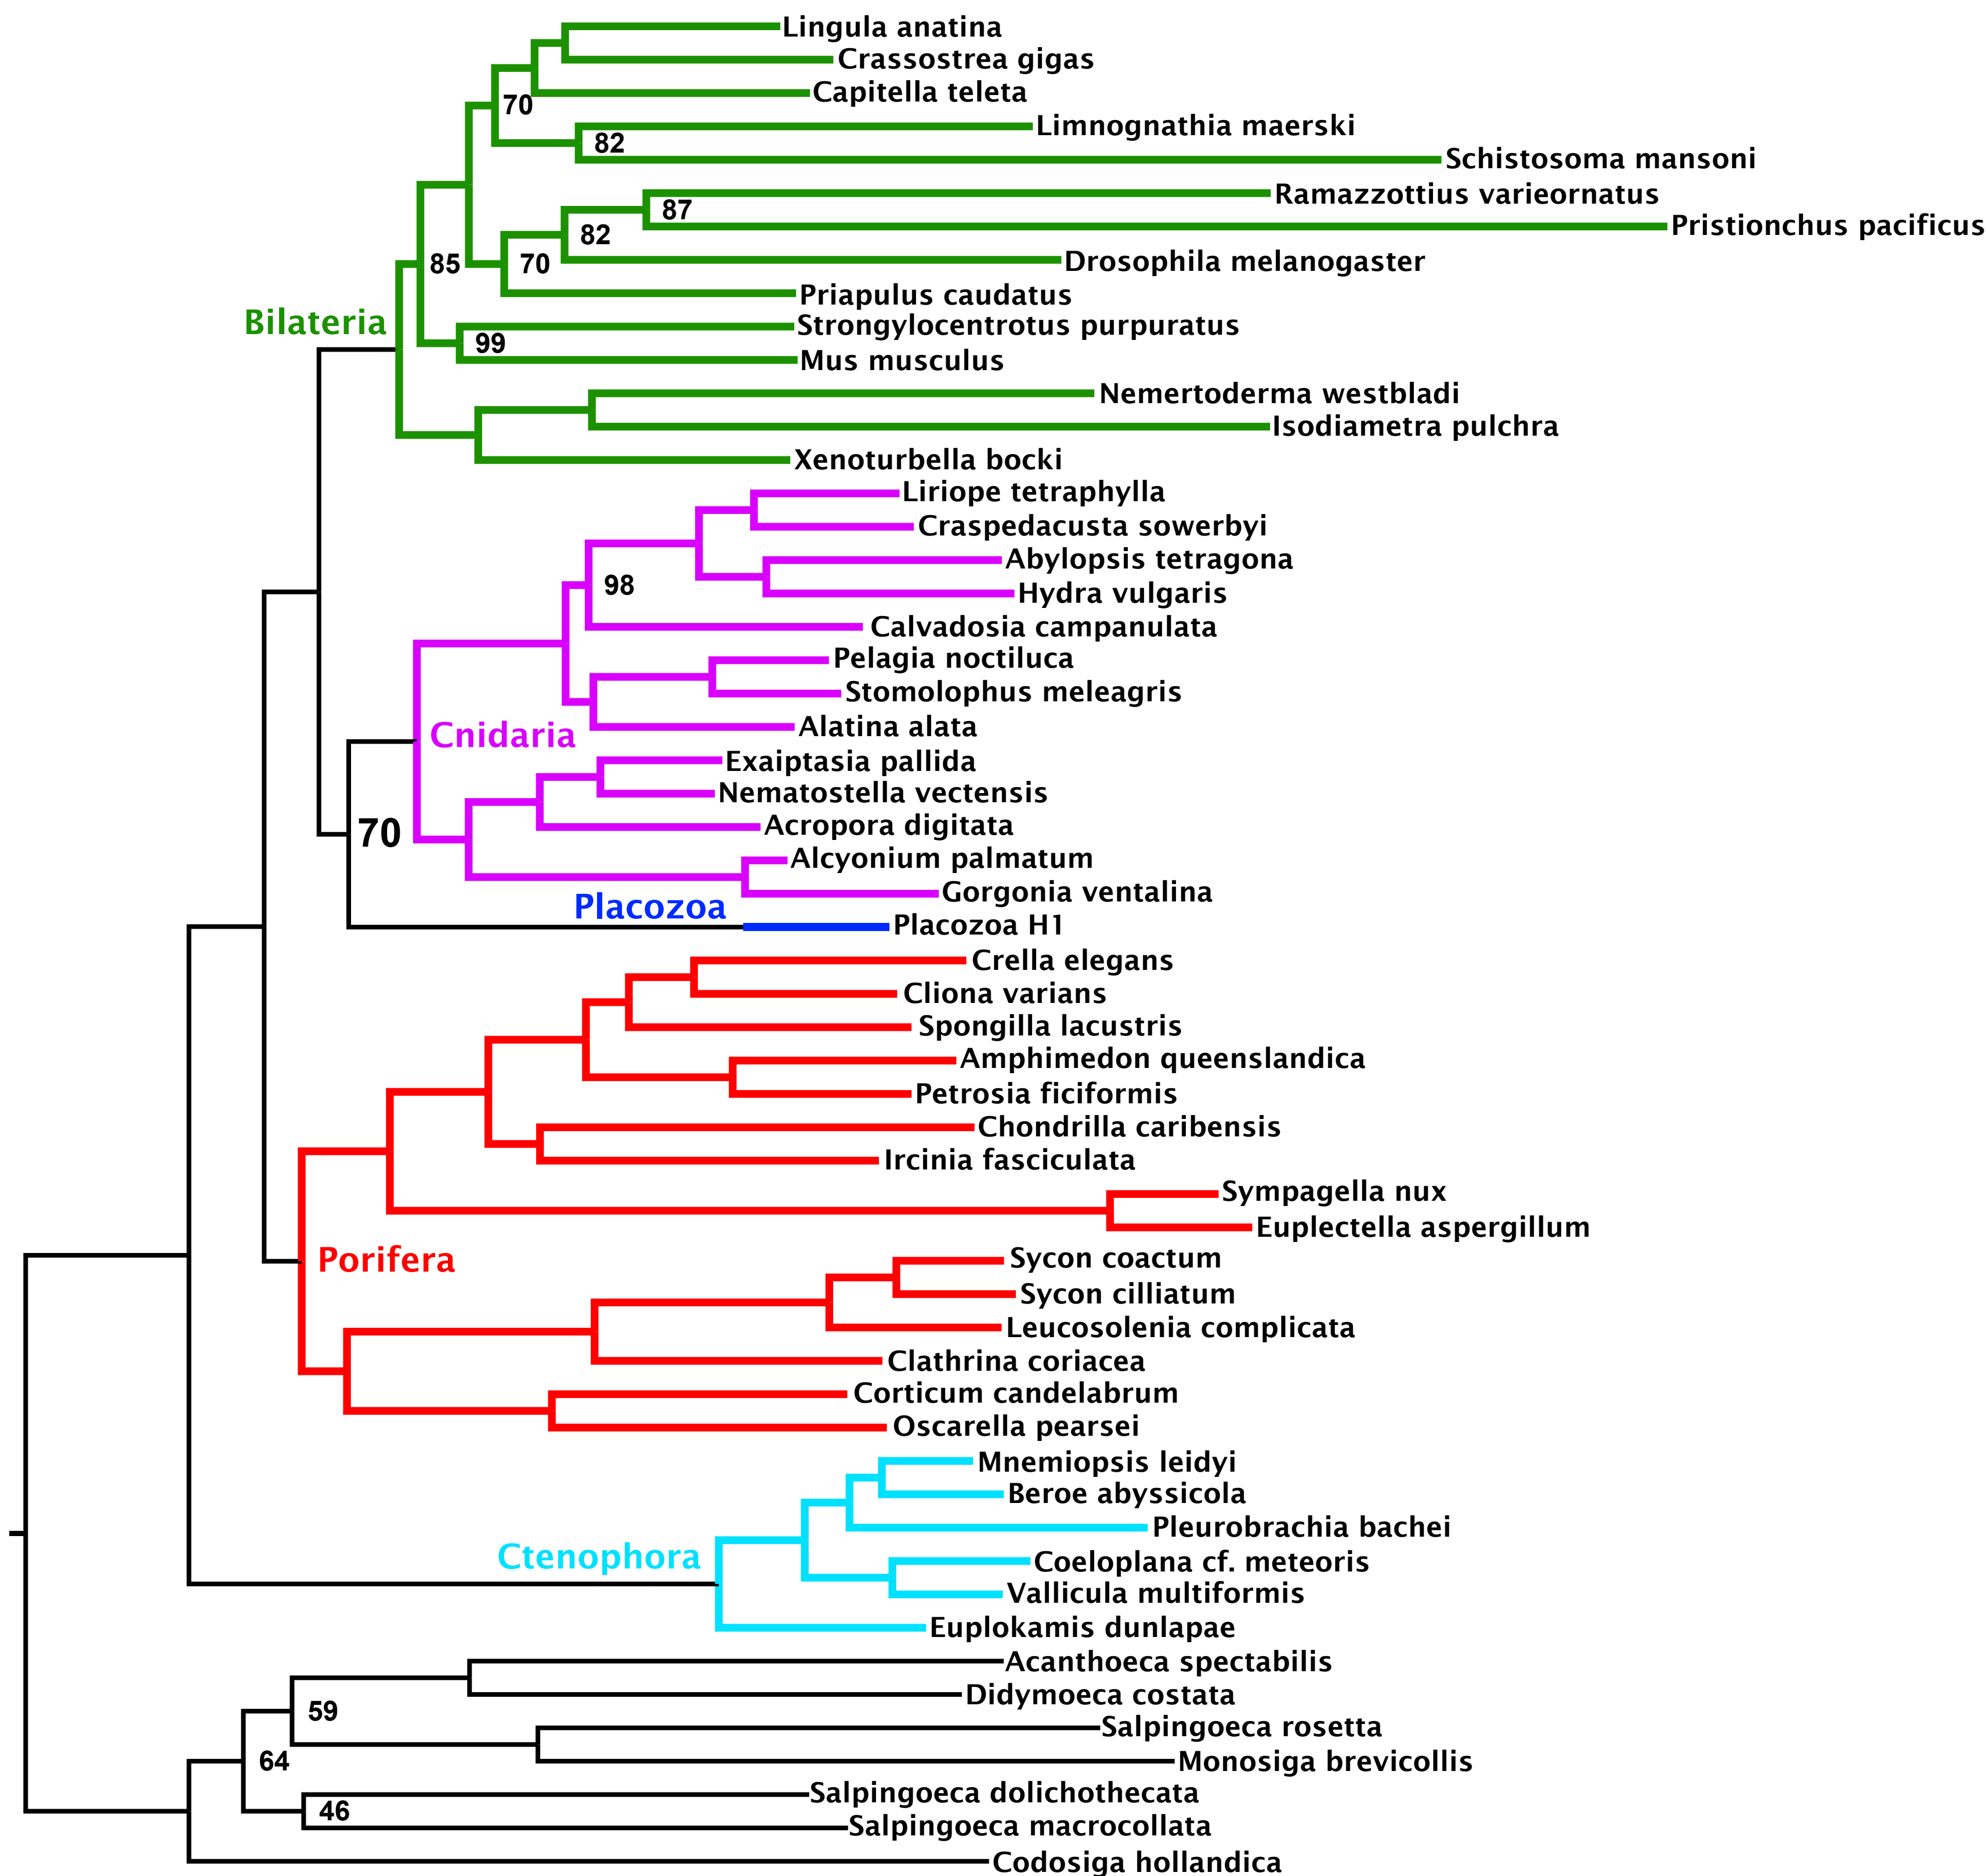

Supplement: supp [file elife-36278-supp-v1.zip]

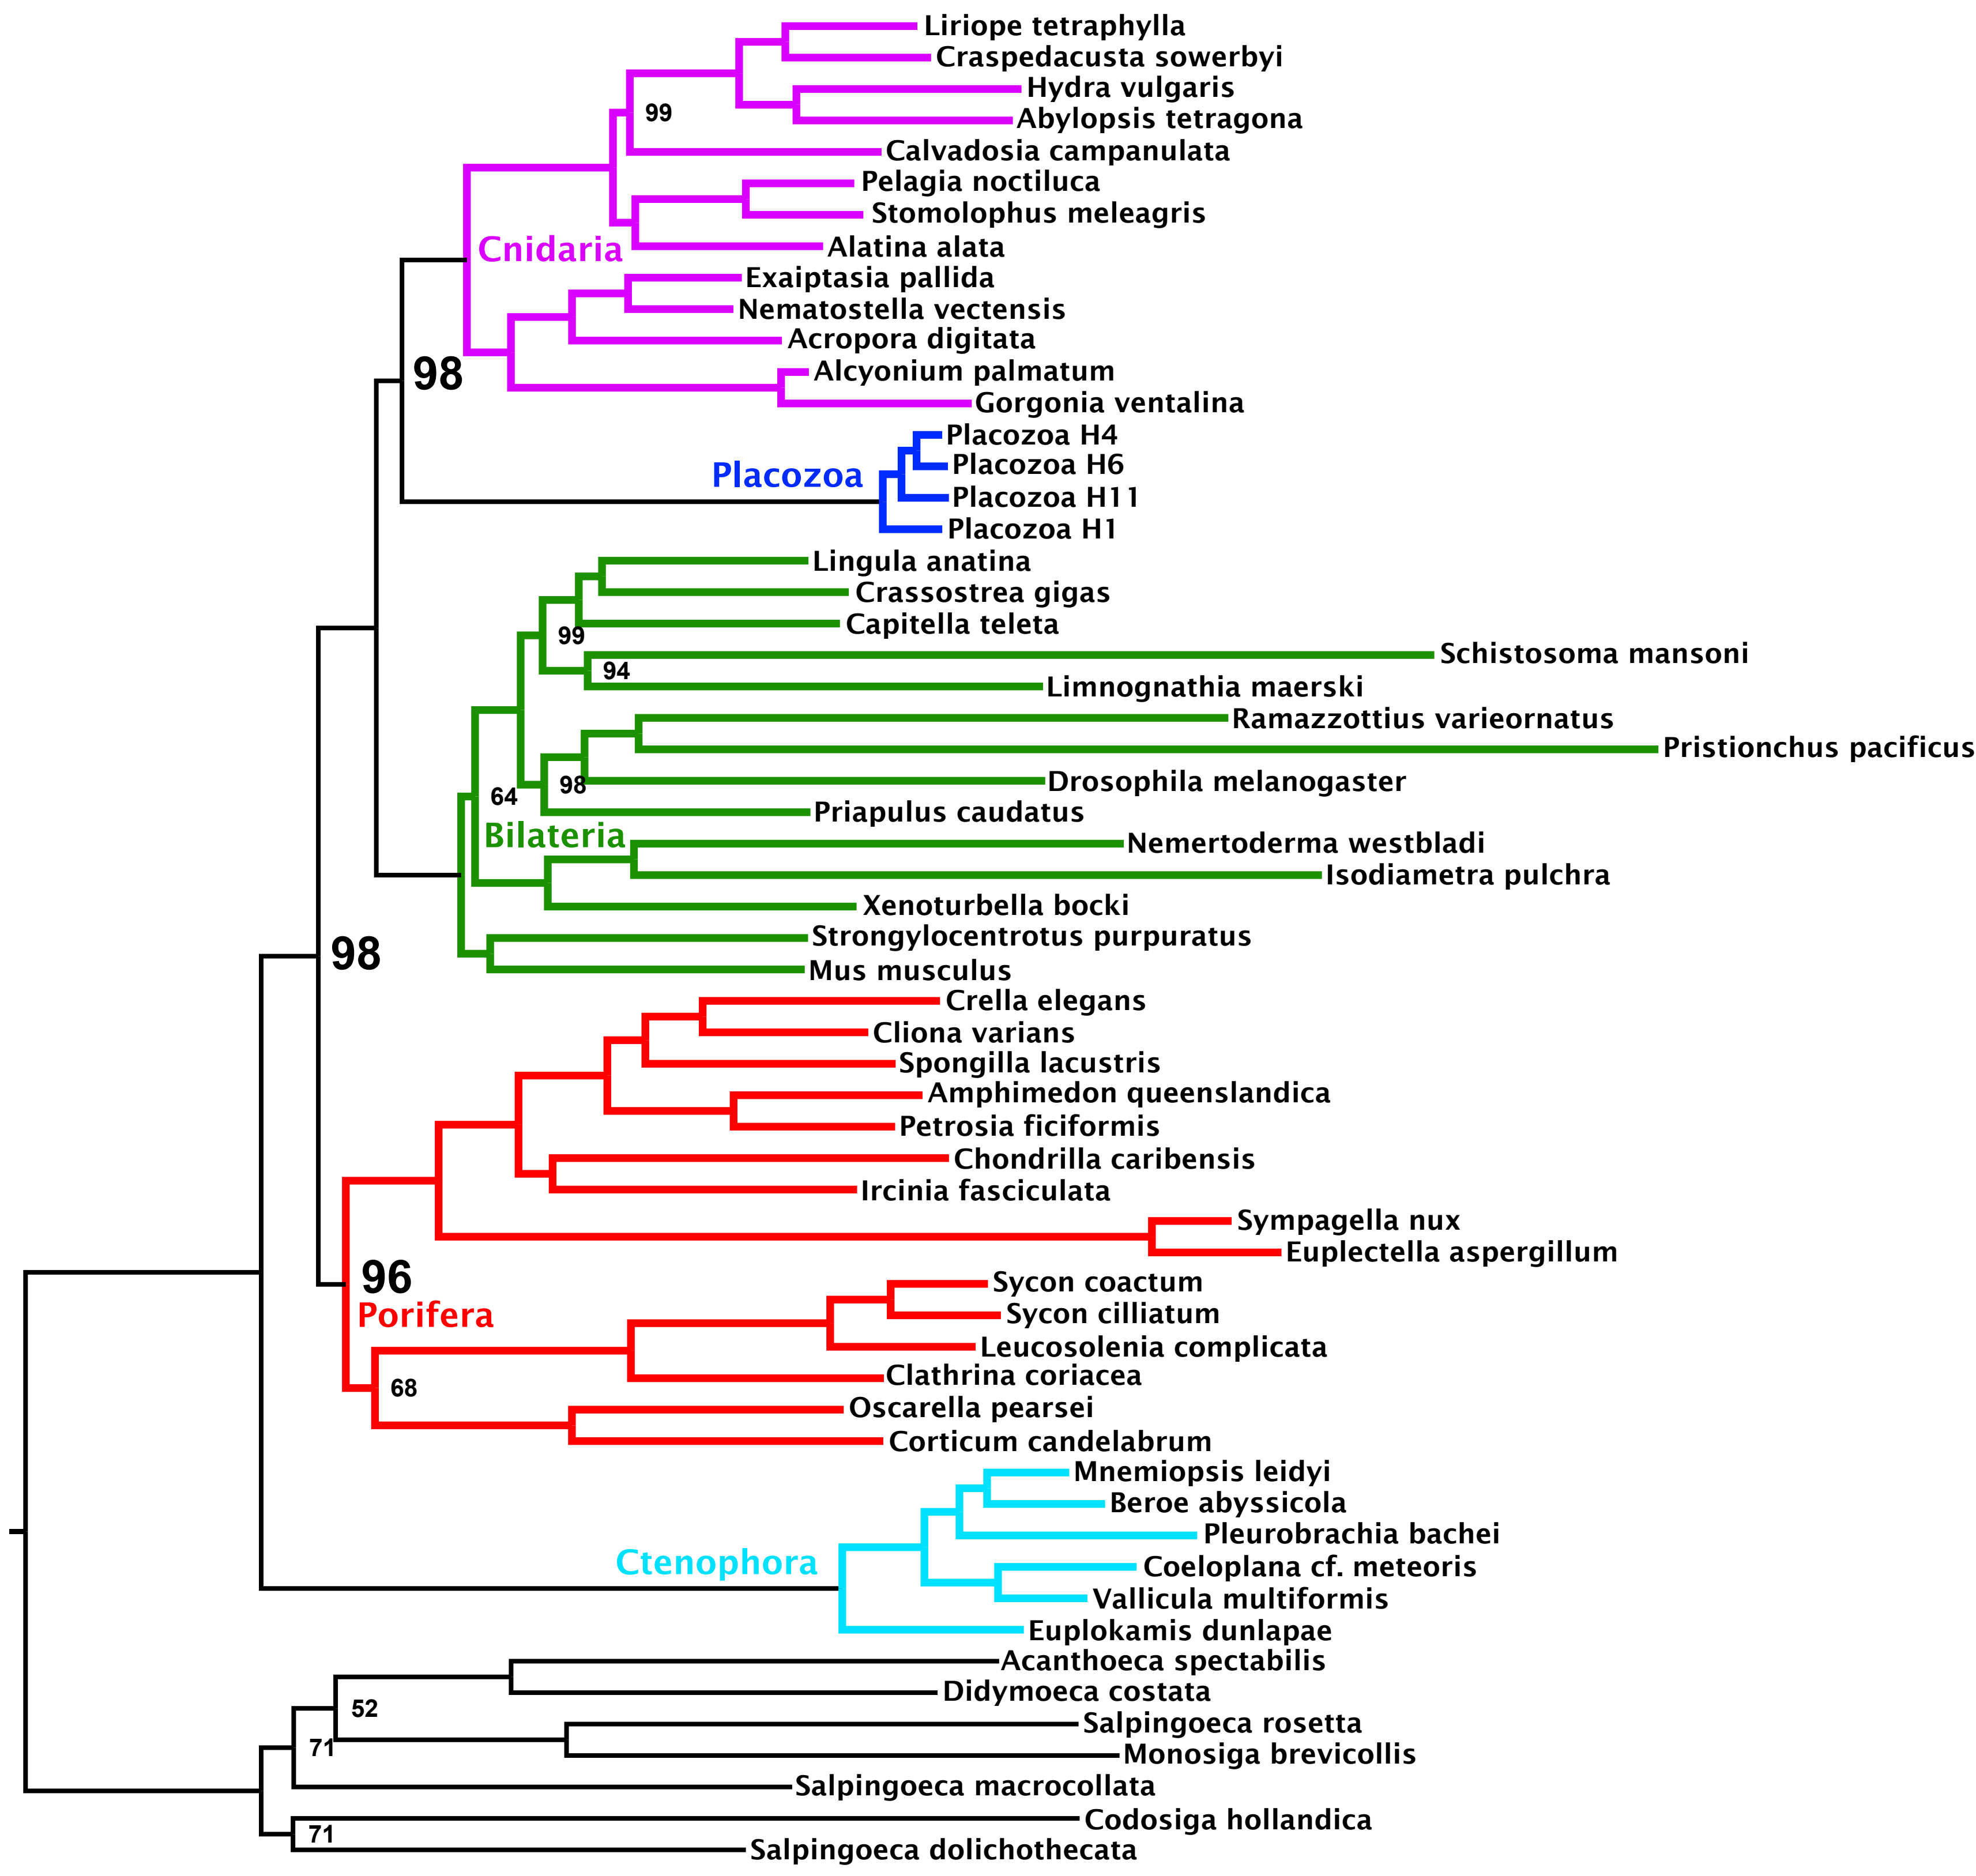

Supplement: supp [file elife-36278-supp-v1.zip]
